# Supplementary material for: Atomic layer deposition of nickel carbide for supercapacitors and electrocatalytic hydrogen evolution
Source: Royal Society of Chemistry journal article supplement (doi:10.1039/c7ta10202j), 2017-12-18
Supplement: c7ta10202j1.pdf [file c7ta10202j1.pdf]

*Electronic Supplementary Information for*

## **Atomic Layer Deposition of Nickel Carbide for Supercapacitors and Electrocatalytic Hydrogen Evolution**

Wei Xiong,<sup>a,#</sup> Qun Guo,<sup>b,#</sup> Zheng Guo,<sup>a</sup> Hao Li,<sup>a</sup> Ran Zhao,<sup>a</sup> Qiang Chen,<sup>b</sup> Zhongwei Liu,<sup>b,\*</sup> and Xinwei Wang<sup>a,\*</sup>

<sup>a</sup> School of Advanced Materials, Shenzhen Graduate School, Peking University, Shenzhen 518055, China

<sup>b</sup> Laboratory of Plasma Physics and Materials, Beijing Institute of Graphic Communication, Beijing 102600, China

<sup>#</sup> These authors contributed equally to this work.

\*Corresponding email: liuzhongwei@bigc.edu.cn (Z.L.); wangxw@pkusz.edu.cn (X.W.)

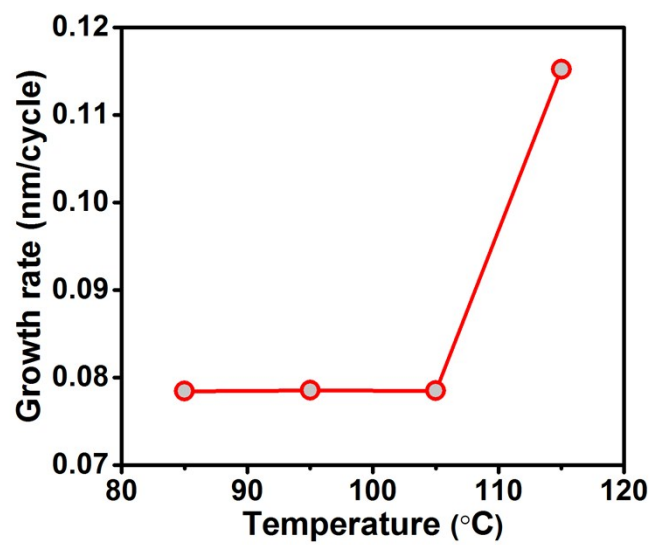

**Figure S1.** ALD growth rate of  $\text{Ni}_3\text{C}$  as a function of deposition temperature.

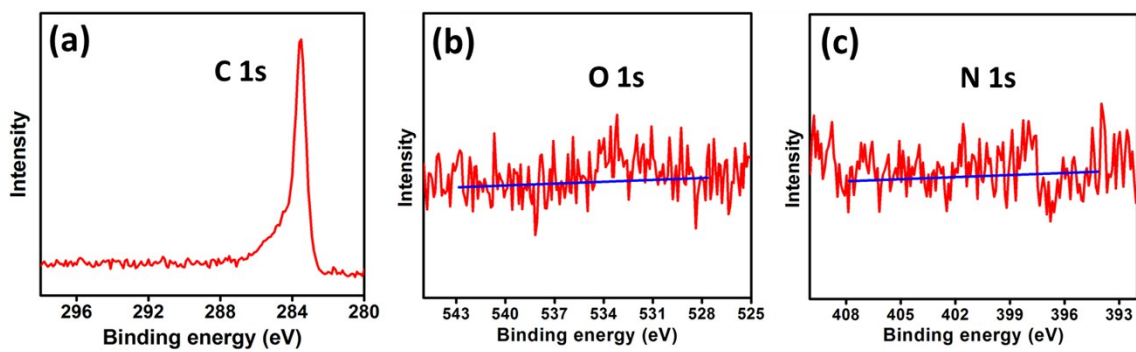

**Figure S2.** High-resolution XPS spectra of (a) C 1s, (b) O 1s, and (c) N 1s for the ALD  $\text{Ni}_3\text{C}$  film.

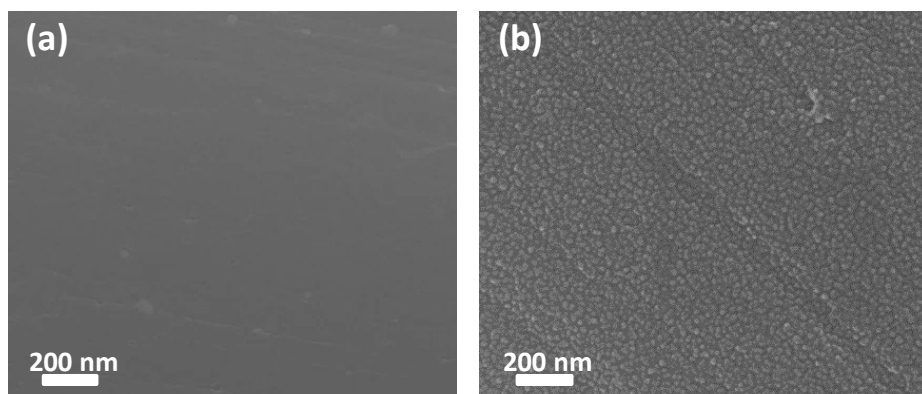

**Figure S3.** High-resolution SEM images of (a) pristine CC and (b) ALD Ni<sub>3</sub>C coated CC.

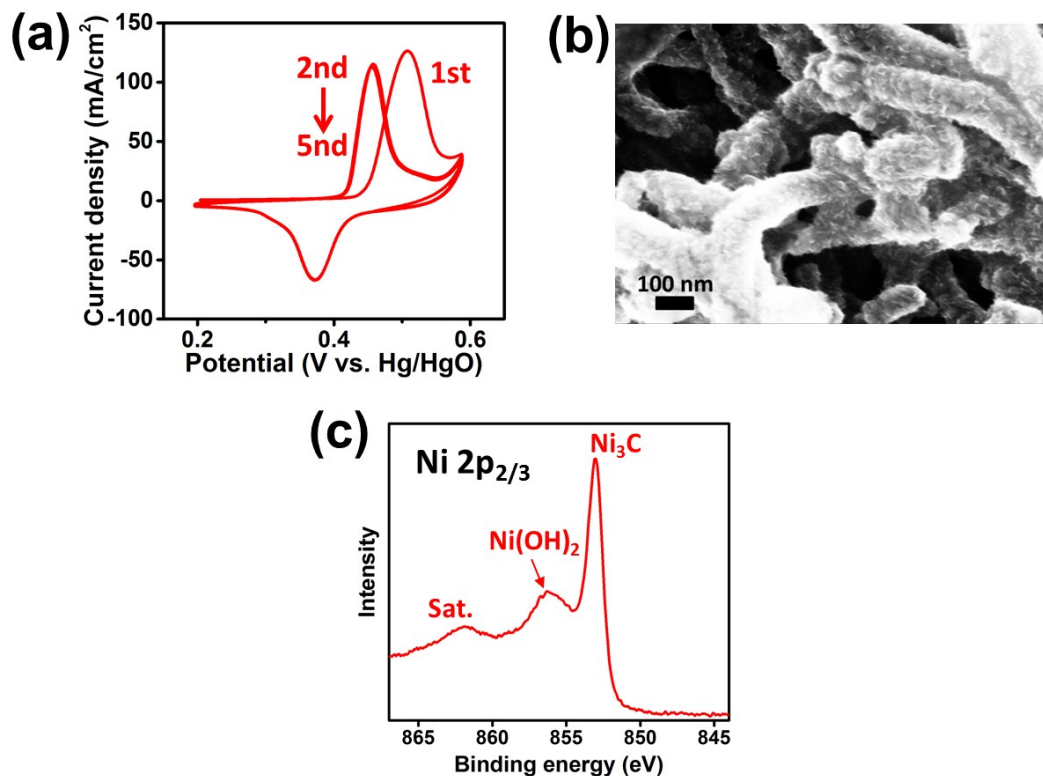

**Figure S4.** (a) CV curves for the initial 6 cycles of the ALD Ni<sub>3</sub>C/CNT electrode (scan rate 30 mV/s). The first-cycle curve is apparently different from the following cycles, which implies possible irreversible oxidation of the surface Ni<sub>3</sub>C ( $\frac{1}{3} \text{Ni}_3\text{C} + 3\text{OH}^- \rightarrow \text{NiOOH} + \text{H}_2\text{O} + \frac{1}{3}\text{C} + 3\text{e}^-$ ) during the first anodic scan (*J. Solid State Electrochem.* 2016, **20**, 775). The subsequently CV curves show a reversible redox pair centered at 0.41 V, which corresponds to the redox reaction between Ni(OH)<sub>2</sub>/NiOOH ( $\text{Ni(OH)}_2 + \text{OH}^- \leftrightarrow \text{NiOOH} + \text{H}_2\text{O} + \text{e}^-$ ). (*Electrochim. Acta*, 2016, **204**, 160–168; *J. Mater. Chem. A*, 2013, **1**, 7880–7884; *Adv. Funct. Mater.*, 2012, **22**, 1272–1278) (b) SEM image of the Ni<sub>3</sub>C/CNT after CV cycling for 5000 cycles. On the Ni<sub>3</sub>C/CNT surface formed some nanoflakes, which were representative for Ni(OH)<sub>2</sub> (*Adv. Funct. Mater.*, 2012, **22**, 1272–1278; *J. Mater. Chem. A*, 2015, **3**, 19545–19555). (c) XPS Ni 2p<sub>3/2</sub> spectrum taken after the 5000-cycle CV, in which a peak corresponding to Ni(OH)<sub>2</sub> was observed (*Adv. Funct. Mater.*, 2015, **25**, 7530–7538), suggesting the formation of the Ni(OH)<sub>2</sub> on the Ni<sub>3</sub>C surface.

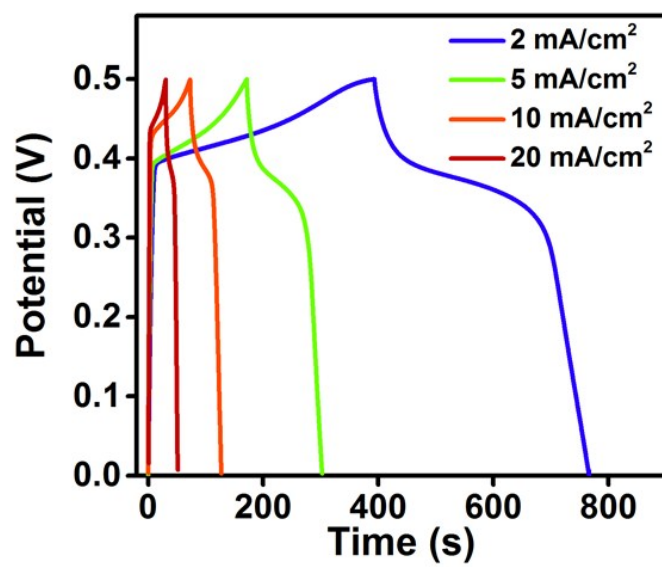

**Figure S5.** Charge-discharge curves of the ALD Ni<sub>3</sub>C/CNT electrode at various current densities.

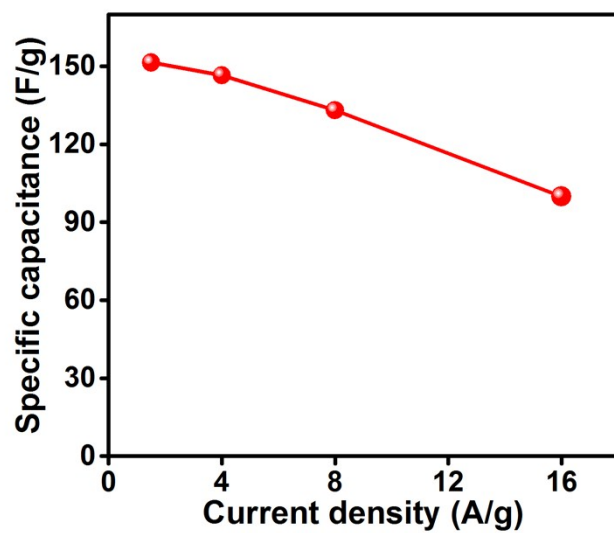

**Figure S6.** Specific capacitance of the  $\text{Ni}_3\text{C}/\text{CNT}/\text{AC}$  supercapacitor with respect to discharge current density.

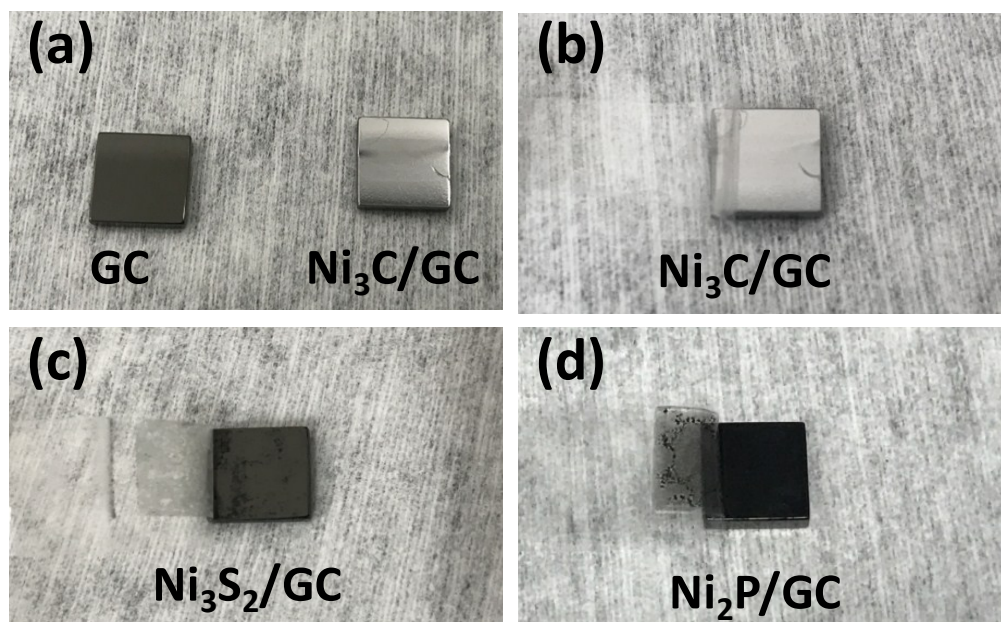

**Figure S7.** (a) Photograph of glassy carbon (GC) and ALD  $\text{Ni}_3\text{C}$  coated GC ( $\text{Ni}_3\text{C}/\text{GC}$ ). Photographs of tape tests for (b)  $\text{Ni}_3\text{C}/\text{GC}$  (passed), (c)  $\text{Ni}_3\text{S}_2/\text{GC}$  (failed), and (d)  $\text{Ni}_2\text{P}/\text{GC}$  (failed).  $\text{Ni}_3\text{S}_2/\text{GC}$  was synthesized by electrodeposition of  $\text{Ni}_3\text{S}_2$  on GC (Xing, *et al.*, *J. Power Sources* **2014**, 245, 463–467), and  $\text{Ni}_3\text{S}_2/\text{GC}$  was synthesized by phosphorization of  $\text{Ni}(\text{OH})_2$  on GC (Zhou, *et al.*, *Adv. Funct. Mater.* **2015**, 25, 7530–7538).



**Table S1.** Comparison of the supercapacitor performance for the ALD Ni<sub>3</sub>C/CNT and various other reported Ni-based materials.

| Active materials                                     | Specific capacitance       | Capacitance retention upon cycling         | Reference                                                    |
|------------------------------------------------------|----------------------------|--------------------------------------------|--------------------------------------------------------------|
| <b>Ni<sub>3</sub>C/CNT</b>                           | <b>1850 F/g (at 4 A/g)</b> | <b>98.5% (after 5000 cycles at 40 A/g)</b> | <b>This work</b>                                             |
| Ni(OH) <sub>2</sub> /Ni foam                         | 2384 F/g (at 1 A/g)        | 75% (after 1000 cycles at 5 A/g)           | <i>Nano Energy</i><br><b>2015</b> , 11, 154                  |
| Mg-Ni(OH) <sub>2</sub>                               | 1931 F/g (at 0.5A/g)       | 95% (after 10000 cycle at 10 A/g)          | <i>ACS Energy Lett.</i> ,<br><b>2016</b> , 1, 814            |
| Ni <sub>3</sub> S <sub>2</sub> /3D-rGO               | 1886 F/g (at 1 A/g)        | 91% (after 30000 cycle at 2 A/g)           | <i>ACS Energy Lett.</i> ,<br><b>2017</b> , 2, 759            |
| Ni(OH) <sub>2</sub> /g-C <sub>3</sub> N <sub>4</sub> | 1768 F/g ( at 7 A/g)       | 84 % (after 8000 cycle at 51 A/g)          | <i>ACS Appl. Mater. Interfaces</i><br><b>2017</b> , 9, 17890 |
| Ni-P                                                 | 1597 F/g (at 0.5 A/g)      | 71.4% (after 1000 cycles at 2 A/g)         | <i>J. Power Sources</i><br><b>2015</b> , 274, 1107           |
| NiMoO <sub>4</sub> nanowires                         | 1587 F/g (at 6 A/g)        | 76.9% (after 4000 cycles at 18 A/g)        | <i>Nano Energy</i><br><b>2014</b> , 8, 174                   |
| Ni(OH) <sub>2</sub> /graphite                        | 1560 F/g (at 0.5 A/g)      | 65% (after 1000 cycles at 10 A/g)          | <i>ACS Nano</i><br><b>2013</b> , 7, 6237                     |
| NiO/GO foam                                          | 1225 F/g (at 2 A/g)        | 94% (after 2000 cycles at 12 A/g)          | <i>J. Mater. Chem. A</i><br><b>2014</b> , 2, 3223            |
| NiCo <sub>2</sub> O <sub>4</sub> hollow spheres      | 1141 F/g (at 1 A/g)        | 94.7% (after 4000 cycles at 5 A/g)         | <i>Angew. Chem. Int. Ed</i><br><b>2014</b> , 53, 1488        |
| NiCo <sub>2</sub> S <sub>4</sub> hollow spheres      | 1036 F/g (at 1 A/g)        | 87% ( after 2000 cycles at 5 A/g )         | <i>Nat. Commun.</i><br><b>2015</b> , 6, 6694                 |
| Ni <sub>3</sub> N/CC                                 | 990 F/g (at 3.5 A/g)       | 50% (after 2000 cycles at 100 mV/s)        | <i>J. Mater. Chem. A</i><br><b>2016</b> , 24, 9844           |
| NiS/rGO                                              | 905 F/g (at 0.5 A/g)       | 90% (after 2000 cycles at 4 A/g)           | <i>Nano Energy</i><br><b>2014</b> , 5, 74                    |
| Ni <sub>0.85</sub> Se/MoSe <sub>2</sub>              | 774 F/g (at 1 A/g)         | 95% (after 1000 cycles at 3 A/g)           | <i>ACS Appl. Mater. Interfaces</i><br><b>2017</b> , 9, 17067 |
| Ni-B/carbon fiber                                    | 733 F/g (at 5 mV/s)        | 72% (after 1000 cycles at 10 mV/s )        | <i>J. Mater. Sci.</i> ,<br><b>2015</b> , 50, 4622            |
| CoNiAl-LDH/AC                                        | 501 F/g (at 10 A/g)        | 91% (after 1000 cycles at 6 A/g)           | <i>Nanoscale</i><br><b>2014</b> , 6, 3097                    |

**Table S2.** Comparison of the HER performance of the ALD Ni<sub>3</sub>C/CNT with various other nonprecious catalysts in alkaline solution.

| Active materials                              | Overpotential<br>( $j = -10 \text{ mA/cm}^2$ ) | Tafel slope<br>(mV/dec) | Long-term stability<br>(current retention under constant bias)       | Reference                                              |
|-----------------------------------------------|------------------------------------------------|-------------------------|----------------------------------------------------------------------|--------------------------------------------------------|
| Ni <sub>3</sub> C/CNT                         | <b>-132 mV</b>                                 | <b>49</b>               | <b>93% after 48 h (initial <math>j = -10 \text{ mA/cm}^2</math>)</b> | <b>This work</b>                                       |
| NiO/Ni-CNT                                    | -80 mV                                         | 82                      | 95% after 2 h (initial $j = -5 \text{ mA/cm}^2$ )                    | <i>Nat. Commun.</i><br><b>2014</b> , 5, 4695           |
| Ni <sub>1-x</sub> Fe <sub>x</sub> /Nanocarbon | -184 mV                                        | 100                     | 91% after 0.3 h (initial $j = -20 \text{ mA/cm}^2$ )                 | <i>ACS Catal.</i><br><b>2016</b> , 6, 580              |
| Ni/N-Graphene                                 | -205 mV                                        | 160                     | 90.5% after 10 h (initial $j = -10 \text{ mA/cm}^2$ )                | <i>Adv. Mater.</i><br><b>2017</b> , 26,<br>1605957     |
| Co <sub>0.85</sub> Se/NiFe-LDH                | -265 mV                                        | 160                     | 86% after 10 h (initial $j = -10 \text{ mA/cm}^2$ )                  | <i>Energy Environ. Sci.</i><br><b>2016</b> , 9, 478    |
| Ni/NiS                                        | -230 mV                                        | 115                     | 84% after 12 h (initial $j = -10 \text{ mA/cm}^2$ )                  | <i>Adv. Funct. Mater.</i><br><b>2016</b> , 26, 3314    |
| Co-C-N complex                                | -178 mV                                        | 102                     | 80% after 40 h (initial $j = -30 \text{ mA/cm}^2$ )                  | <i>J. Am. Chem. Soc.</i><br><b>2015</b> , 137, 15070   |
| Mo <sub>2</sub> C                             | -190 mV                                        | 54                      | 80% after 48 h (initial $j = -17 \text{ mA/cm}^2$ )                  | <i>Angew. Chem.</i><br><b>2012</b> , 124, 12875        |
| Ni <sub>5</sub> P <sub>4</sub>                | -150 mV                                        | 59                      | 50% after 20 h (initial $j = -10 \text{ mA/cm}^2$ )                  | <i>Angew. Chem.</i><br><b>2015</b> , 54, 12361         |
| MoC <sub>x</sub>                              | -151 mV                                        | 75                      | 27% after 11 h (initial $j = -15 \text{ mA/cm}^2$ )                  | <i>Nat. Commun.</i><br><b>2015</b> , 6, 6512           |
| MoP                                           | -169 mV                                        | 70                      | 15% after 10 h (initial $j = -10 \text{ mA/cm}^2$ )                  | <i>Nano Energy</i><br><b>2017</b> , 32, 511            |
| MoP                                           | -125 mV                                        | 48                      | 60% after 40 h (initial $j = -15 \text{ mA/cm}^2$ )                  | <i>Energy Environ. Sci.</i> , <b>2014</b> , 7,<br>2624 |
| MoSe <sub>2</sub> @Ni <sub>0.85</sub> Se      | -117 mV                                        | 66                      | 77% after 20 h (initial $j = -20 \text{ mA/cm}^2$ )                  | <i>Electrochim. Acta</i><br><b>2017</b> , 246,712      |
